# Supplementary material for: Preparation of a new type 2 diabetic miniature pig model via the CRISPR/Cas9 system
Source: PubMed Central journal article supplement (PMC6817862; doi:10.1038/s41419-019-2056-5), 2019-10-28
Supplement: 41419_2019_2056_MOESM4_ESM.pdf [file 41419_2019_2056_MOESM4_ESM.pdf]

Please complete the table below to indicate the contributions of all named authors to the figures.

Figure 1:

Design and drawing: Xiaodong Zou, Tingting Yu and Xue Chen.  
Layout and modification: Hongsheng Ouyang and Chengzhen Chen.

Figure 2:

Design and drawing: Xiaodong Zou, Tingting Yu and Xue Chen.  
Layout and modification: Hongsheng Ouyang and Chengzhen Chen.

Figure 3:

Design and drawing: Xiaodong Zou, Tingting Yu and Xue Chen.  
Layout and modification: Hongsheng Ouyang and Chengzhen Chen.

Figure 4:

Design and drawing: Xiaodong Zou, Tingting Yu and Xue Chen.  
Layout and modification: Hongsheng Ouyang and Chengzhen Chen.

Figure 5:

Design and drawing: Xiaodong Zou, Tingting Yu and Xue Chen.  
Layout and modification: Hongsheng Ouyang and Chengzhen Chen.

Figure 6:

Signed for and on behalf of the Author(s):

*Chengzhen Chen*

Print Name:

Chengzhen Chen

Date:

September 25, 2019
